# Supplementary material for: Donor–acceptor engineering in conjugated polymer photocatalysts: thieno[3, 2- b ]thiophene-dibenzothiophene sulfone copolymers for noble-metal-free visible-light hydrogen evolution
Source: Royal Society of Chemistry journal article supplement (doi:10.1039/d5ta05975e), 2025-12-06
Supplement: d5ta05975e1.pdf [file d5ta05975e1.pdf]

# Supporting Information

## **Donor-Acceptor Engineering in Conjugated Polymer Photocatalysts: Thieno[3,2-b]thiophene-Dibenzothiophene Sulfone Copolymers for Noble-Metal-Free Visible-Light Hydrogen Evolution**

Guangsen Tian<sup>1</sup>, Shouzheng Li<sup>1</sup>, Shaojia Song<sup>4</sup>, Hongxi Zhao<sup>1</sup>, Linfeng Zhang<sup>1, 5\*</sup>, Huadong Wu<sup>1</sup>,  
Ye Luo<sup>2\*</sup>, Jianding Li<sup>3\*</sup>, Jia Guo<sup>1</sup>, Qun Yi<sup>\*</sup>

<sup>1</sup> State Key Laboratory of Green and Efficient Development of Phosphorus Resources, Key Laboratory for Green Chemical Process of Ministry of Education, Hubei Key Laboratory of Novel Reactor and Green Chemical Technology, Engineering Research Center of Phosphorus Resources Development and Utilization of Ministry of Education, School of Chemical Engineering and Pharmacy, Wuhan Institute of Technology, Wuhan 430205, PR China

<sup>2</sup> School of Optical Information and Energy Engineering & School of Mathematics and Physics, Wuhan Institute of Technology, Wuhan 430205, PR China

<sup>3</sup> Zhejiang Key Laboratory of Industrial Solid Waste Thermal Hydrolysis Technology and Intelligent Equipment, School of Science, Huzhou University, Huzhou, 313000, PR China

<sup>4</sup> College of Chemistry and Chemical Engineering, Taiyuan University of Technology, Taiyuan 030024, PR China

<sup>5</sup> School of Chemical Engineering and Technology, Tianjin University, Tianjin 300072, PR China

**\*Corresponding authors:** L. Zhang: [lfzhang@wit.edu.cn](mailto:lfzhang@wit.edu.cn); Y. Luo: [luo\\_wit@qq.com](mailto:luo_wit@qq.com); Q. Yi: [yq20210901@wit.edu.cn](mailto:yq20210901@wit.edu.cn); J. Li: [jiandingli@zjhu.edu.cn](mailto:jiandingli@zjhu.edu.cn);

21

## 22 Experimental Section

### 23 Synthesis of M1

24 Add 8.42 g of S, S-dioxy-dibenzothiophene and 150 mL of concentrated sulfuric acid to a 500  
25 mL three-necked flask. Stir the mixture until the S, S-dioxy-dibenzothiophene completely dissolves  
26 in the sulfuric acid. Then, add 14.0 g of N-bromosuccinimide (NBS) to the three-necked flask in  
27 batches. Allow the reaction to proceed for 6 hours under an ice bath. After the reaction, pour the  
28 mixture into ice water, resulting in the precipitation of a large amount of white solid. Collect the  
29 solid by suction filtration and wash the filter cake alternately several times with deionized water and  
30 ethanol until the pH of the washings reaches 7. Dry the solid. The dried product is then recrystallized  
31 using dichloromethane to obtain colorless needle-like crystals.

### 32 Synthesis of M2

33 Under N<sub>2</sub> protection, 100 mL of anhydrous DMF was added into a mixture of 3,7-  
34 Dibromodibenzothiophene 5,5-Dioxide (5.795 g), Bis(pinacolato)diboron (9.46 g), CH<sub>3</sub>COOK  
35 (8.76 g) and Pd(dppf)Cl<sub>2</sub> (0.154 g). The reaction solution was heated to 100 °C for 24 h. After  
36 cooling down to room temperature, the mixture was poured into water and extracted with CH<sub>2</sub>Cl<sub>2</sub>.  
37 The organic phase was collected and dried with anhydrous Na<sub>2</sub>SO<sub>4</sub>. The solvent was removed under  
38 vacuum, and then the residue was purified by column chromatography (petroleum ether/CH<sub>2</sub>Cl<sub>2</sub> =  
39 1:5). After drying in vacuum at 60 °C for 24 h, the product was re-crystallized from chloroform and  
40 methanol to gain 3.41 g white crystal in 60% yield. The synthetic paths of the above monomers M1  
41 and M2 are shown in **Fig. S1**. They were also characterized to verify their purity, and the <sup>1</sup>H NMR  
42 results are shown in **Fig. S2** and **Fig. S3**.

### 43 Photocatalytic Experiment

44 In the hydrogen evolution experiments of this work, a LabSolar 6A reaction system (Beijing  
45 PerfectLight Technology Co., Ltd.) was employed. A 300 W Xe lamp equipped with a 420 nm  
46 cutoff filter served as the simulated visible light source. The evolved hydrogen was quantified using  
47 a GC-7806 gas chromatograph (Beijing Shiwei Puxin Analytical Instrument Co., Ltd.), which was  
48 equipped with a chromatographic column and a flame ionization detector (FID), via the external  
49 standard method to evaluate the hydrogen evolution performance of the polymers. Specifically, 10  
50 mg of the polymer powder sample was added to a mixed solvent consisting of 10 mL of DMF and  
51 90 mL of ascorbic acid and stirred for 30 min. The hydrogen evolution simulation experiments were  
52 performed using a 6A all-glass automatic recirculation analysis system. A 300 W xenon lamp was  
53 used as a visible light source, and the UV light was filtered using a UV cutoff filter of  $\lambda$  420 nm.  
54 The dissolved temperature of the test mixture was held at 10 °C by circulating the coolant. The  
55 hydrogen production rate of the polymer was analyzed using an on-line chromatograph.

### 56 Photocatalysis test under natural light illumination

57 The polymer powder (40 mg) was sonicated in 40 mL DMF and 360 mL of ascorbic acid water-  
58 soluble leaf mixture, stirred and dispersed for 30 mins. The outdoor photocatalytic test was  
59 conducted on the roof of Wuhan Institute of Technology (longitude 114.25 E, latitude 30.28 N).  
60 The Weather conditions, including solar intensity and temperature, are recorded regularly. The  
61 photoreactor consisted of a 500 mL round bottom flask connected to an ascending graduated  
62 cylinder to estimate hydrogen production. The volume of hydrogen produced was measured every  
63 half hour in Wuhan, People's Republic of China, on July 24, 2024.

### 64 Characterization

Thermogravimetric analysis (TGA) measurement was performed by using a differential thermal analysis instrument (HITACHI STA200) over the temperature range from 25 to 800 °C under an air atmosphere with a heating rate of 5 °C min<sup>-1</sup>. Fourier transform infrared spectroscopy (FT-IR) was carried out with a NICOLET 5700 FT-IR spectrometer. The samples for FT-IR study were prepared as KBr pellets. Solid-state <sup>13</sup>C NMR spectra were obtained on a Bruker Advance Neo 400WB NMR spectrometer at a MAS rate of 12 kHz. Powder X-ray diffraction (PXRD) measurement was performed by X-ray diffractometer (D8 ADVANCE). XPS analysis was performed using an X-ray photoelectron spectrometer (Escalab 250XI) to determine the elemental composition and chemical states on the sample surface. The obtained results were calibrated against the C 1s peak of carbon at 284.8 eV. In situ XPS measurements were conducted under illumination using the aforementioned conditions. The morphology analysis was performed by using a field emission scanning electron microscope (SEM) (GeminiSEM 300). Uv-Vis absorption spectra of the as-obtained materials were measured on a U-3900 Uv-Vis spectrometer by measuring the reflectance of powders in the solid state. The scan was arranged from 200 to 800 nm and BaSO<sub>4</sub> was chosen as a reflectance standard. Photoluminescence (PL) spectroscopy was recorded via Edinburgh FLS1000 spectrofluorometer at room temperature. The excitation wavelength was 350 nm. The measurements were carried out using a Quantachrome Instruments Autosorb-iQ (Boynton Beach, Florida USA) with extra-high pure N<sub>2</sub> and He gases. Before the adsorption measurements, powdered samples were placed under reduced pressure (<10<sup>-5</sup> bar) at 120 °C for 12 h. The resulting samples were then used for gas adsorption measurements from 0 to 1 atm at 77 K. The residual Pd content was determined by inductively coupled plasma optical emission spectrometry (ICP-OES). The photocurrent, Mott-Schottky analysis and electrochemical impedance spectra (EIS) were measured using a CHI 600

87 electrochemical workstation (Shanghai, China). A homogeneous suspension of samples was  
88 prepared by dispersing 5 mg sample in 270  $\mu\text{L}$  ethanol and 30  $\mu\text{L}$  Nafion (10 wt% Nafion in ethanol)  
89 was added as an additive and the mixture were mechanically grounded/ sonicated for 10 min. The  
90 working electrode was prepared by applying 50  $\mu\text{L}$  of the uniform suspension to the surface of the  
91 graphite working electrode and then forming a film in a vacuum oven at 50  $^{\circ}\text{C}$ . The EIS  
92 measurement was performed in a home-made three-electrode quartz cell employing electrolyte  
93 solution (the concentration of  $\text{K}_3\text{Fe}(\text{CN})_6$ ,  $\text{K}_4\text{Fe}(\text{CN})_6$ ,  $\text{KCl}$  were all 0.1 M). The photocurrent and  
94 Mott-Schottky curves were performed in a home-made three-electrode quartz cell employing 0.1 M  
95  $\text{Na}_2\text{SO}_4$  as electrolyte solution, the difference was using 300 W xenon lamp (PLS-SXE 300) as the  
96 light source for the photocurrent. The femtosecond transient absorption (fs-TA) experiments were  
97 performed using a regenerative amplified Ti: sapphire laser system (Coherent Inc.; 800 nm, 85 fs,  
98 7 mJ per pulse, 1 kHz repetition rate) as the light source, in conjunction with a Helios spectrometer  
99 (Ultrafast Systems LLC). The instrument response function (IRF) for this setup was measured to be  
100 approximately 120 fs. The theoretical calculations were performed via the Gaussian 16 suite of  
101 programs. The structure of the studied molecules was fully optimized at the B3LYP-D3BJ/6-31g  
102 (d, p) level of theory. The vibrational frequencies of the optimized structures were carried out at the  
103 same level. The structure was characterized as a local energy minimum on the potential energy  
104 surface by verifying that all the vibrational frequencies were real. The electrostatic potentials of  
105 molecule has been calculated and analyzed using the Multiwfn software, and the isosurfaces have  
106 been visualized using the Visual Molecular Dynamics (VMD) program.

#### 107 **The apparent quantum yield measurement**

108 The apparent quantum yield (AQY) for hydrogen evolution was measured with monochromatic

light obtained by using band pass filter of 420, 475, 520 nm and 600 nm. The AQY was calculated as below:

$$\eta = \frac{2 \times M \times N_A \times h \times c}{S \times P \times t \times \lambda} \times 100\%$$

Where M is the amount of the produced H<sub>2</sub> (mol), N<sub>A</sub> is Avogadro constant (6.022×10<sup>23</sup>/mol), h is the Planck constant (6.626×10<sup>-34</sup> J·s), c is the speed of light (3×10<sup>8</sup> m/s), S is the irradiation area of the incident light (cm<sup>2</sup>), P is the intensity of incident light (W/cm<sup>2</sup>), t is the photoreaction time (s), λ is the wavelength of the monochromatic light (m). According to the equation, the apparent quantum yield is related to the intensity of incident light and the irradiation area. These parameters in different groups are possibly different, resulting in different apparent quantum yields. For the AQY measurement, the dosage of polymer photocatalyst is 10 mg. The photoreaction time and irradiation area are t=3600 s, S=3.14 cm<sup>2</sup>, respectively. The incident light intensity at wavelengths of 420 nm, 475 nm, 520 nm, and 600 nm was 2699 nW, 306 nW, 340 nW, 313 nW.

#### Fluorescence life test

The fluorescence lifetime of the polymers was analyzed by time-resolved photoluminescence spectroscopy with the following formula. The parameters are all the data in the fitting process, as shown in **Table S2**.

$$\tau_{ave} = \frac{A_1 T_1^2 + A_2 T_2^2}{A_1 T_1 + A_2 T_2}$$

#### Table S1

131 **Table S1** Feed composition and resulting polymer designations

| TPA<br>(mol) | T (mol) | DT (mol) | TT (mol) | M1 (mol) | M2 (mol) | CPs         |
|--------------|---------|----------|----------|----------|----------|-------------|
| 1            | 3       |          |          | 15       | 16       | TPA-T-BTDO  |
| 1            |         | 3        |          | 15       | 16       | TPA-DT-BTDO |
| 1            |         |          | 3        | 15       | 16       | TPA-TT-BTDO |
| 1            |         |          |          | 15       | 16       | TPA-BTDO    |
|              |         |          |          | 1        | 1        | PDBTSO      |

132 **Table S2**

133 **Table S2** Pore structure characteristic parameters of the polymers

| Samples     | Specific surface area<br>(m <sup>2</sup> g <sup>-1</sup> ) | Total pore volume<br>(cm <sup>3</sup> ·g <sup>-1</sup> ) | Average pore width<br>(nm) |
|-------------|------------------------------------------------------------|----------------------------------------------------------|----------------------------|
| TPA-T-BTDO  | 137.78                                                     | 0.30                                                     | 8.68                       |
| TPA-DT-BTDO | 84.03                                                      | 0.25                                                     | 6.35                       |
| TPA-TT-BTDO | 72.17                                                      | 0.058                                                    | 3.24                       |

134 **Table S3**

135 **Table S3** Calculated fluorescence lifetimes for the polymers

| CPs         | A <sub>1</sub> | τ <sub>1</sub> | A <sub>2</sub> | τ <sub>2</sub> | τ <sub>ave</sub> (ns) | R <sup>2</sup> |
|-------------|----------------|----------------|----------------|----------------|-----------------------|----------------|
| TPA-T-BTDO  | 1.08717        | 0.98585        | 0.03449        | 20.3737        | 8.66                  | 98982          |
| TPA-DT-BTDO | 1.08622        | 1.1762         | 0.0512         | 13.96473       | 5.77                  | 0.99067        |
| TPA-TT-BTDO | 1.0858         | 1.00487        | 0.0528         | 19.30515       | 9.84                  | 0.99003        |

136

137 **Table S4**

138 **Table S4** Hydrogen production rate of the TPA-TT-BTDO under natural light conditions

| Time        | illumination intensity<br>(W cm <sup>-2</sup> ) | H <sub>2</sub> capacity (mL) | HER (mmol h <sup>-1</sup> g <sup>-1</sup> ) |
|-------------|-------------------------------------------------|------------------------------|---------------------------------------------|
| 10:00-10:30 | 32                                              | 41                           | 67                                          |
| 10:30-11:00 | 41                                              | 40                           | 89                                          |
| 11:00-11:30 | 38                                              | 34                           | 76                                          |
| 11:30-12:00 | 76                                              | 56                           | 125                                         |
| 12:00-12:30 | 67                                              | 46                           | 102                                         |
| 12:30-13:00 | 70                                              | 46                           | 102                                         |
| 13:00-13:30 | 49                                              | 36                           | 80                                          |

139



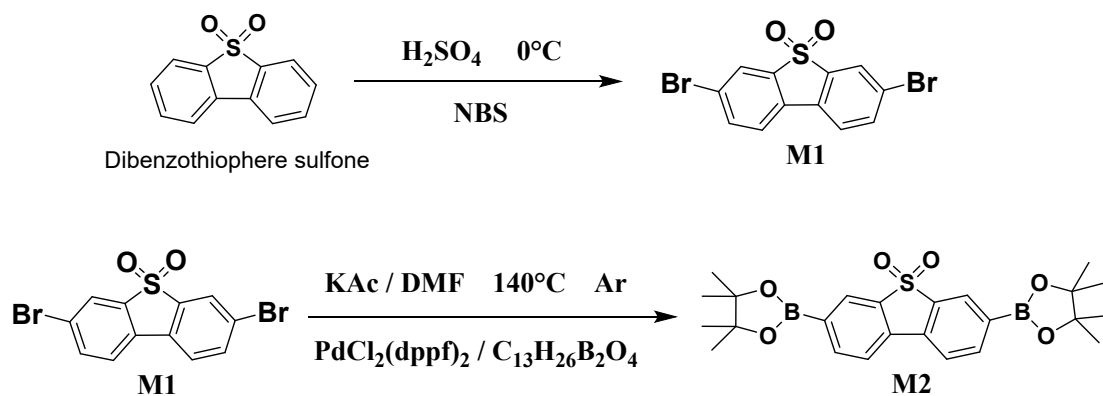

**Fig. S1** Methods for the synthesis of the M1 and M2 monomers

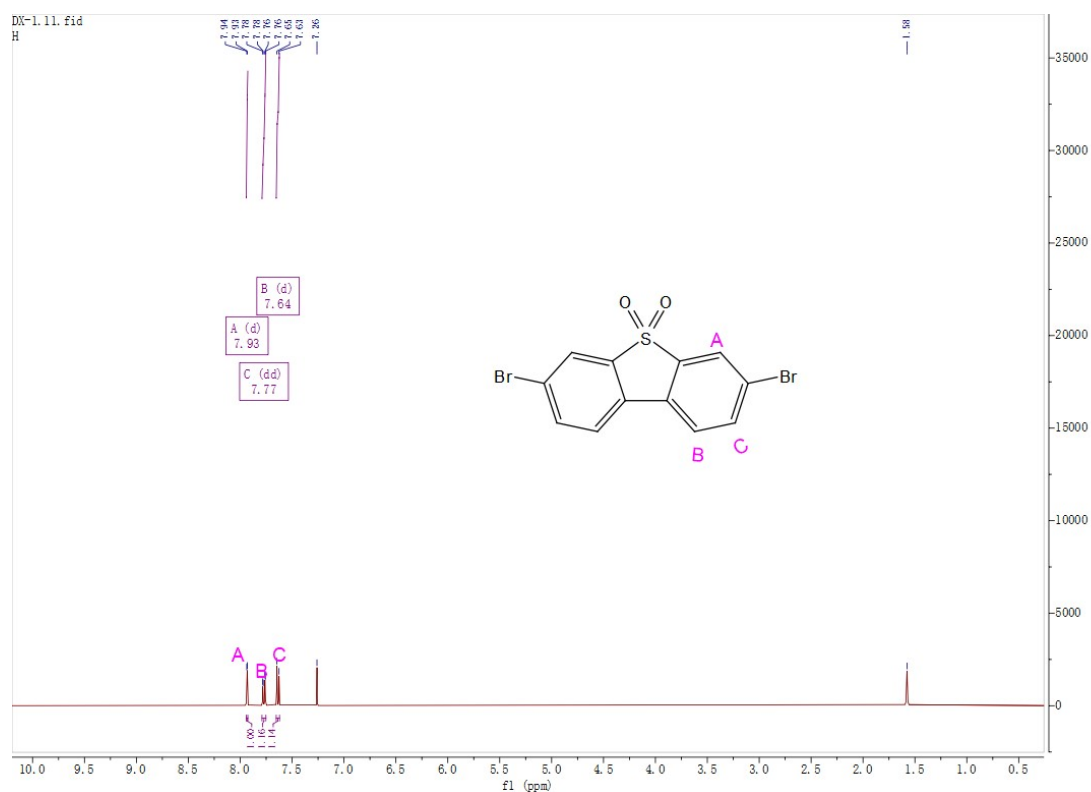

**Fig. S2** The <sup>1</sup>H NMR spectrum of M1

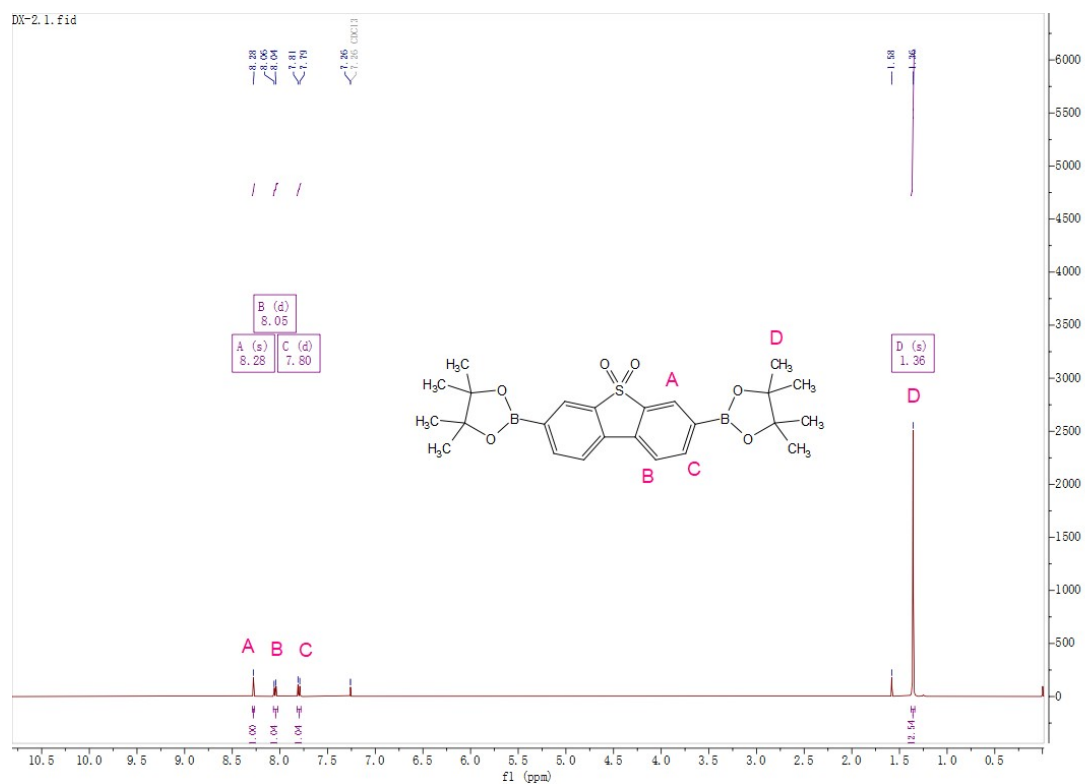

**Fig. S3** The  $^1\text{H}$  NMR spectrum of M2

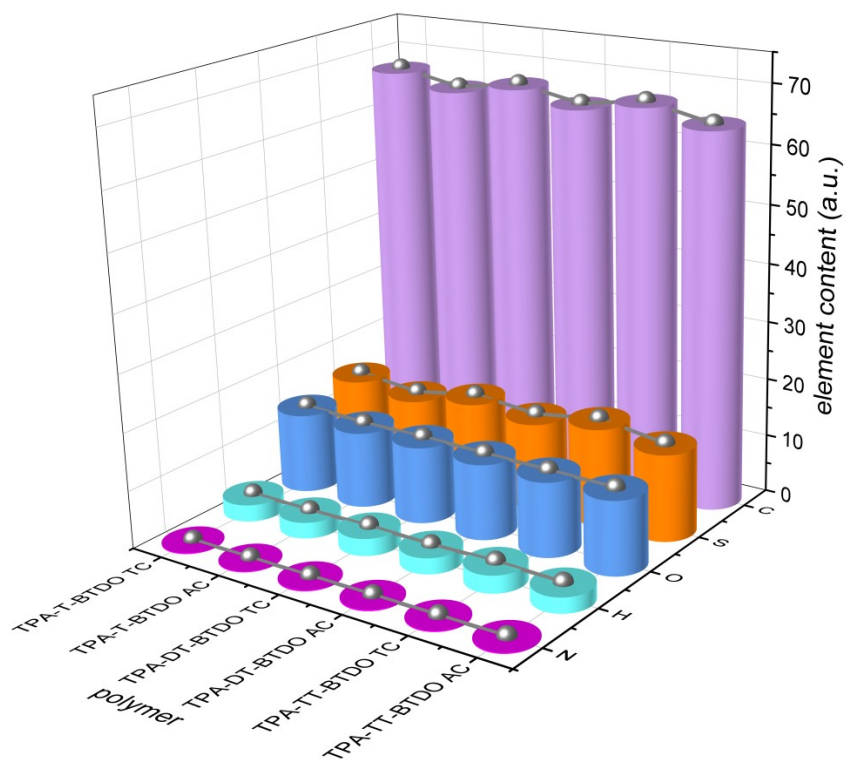

**Fig. S4** Comparative analysis chart of organic element contents between prepared polymers and

150 their theoretical values

151

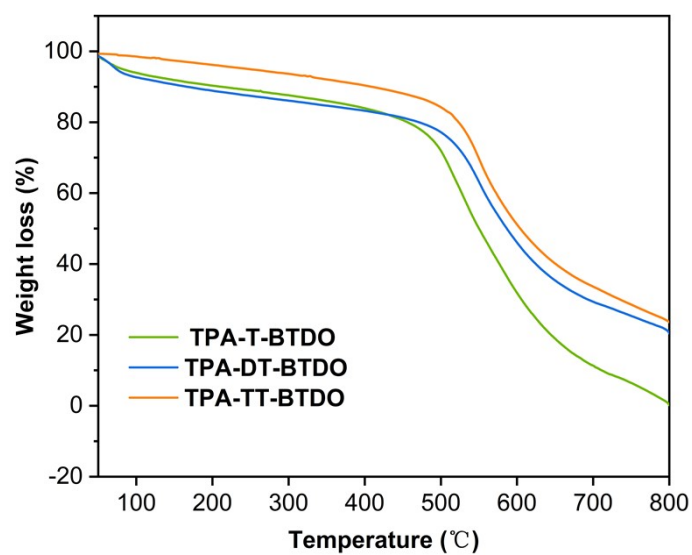

152

153 **Fig. S5** TGA curve of polymers under nitrogen atmosphere

154

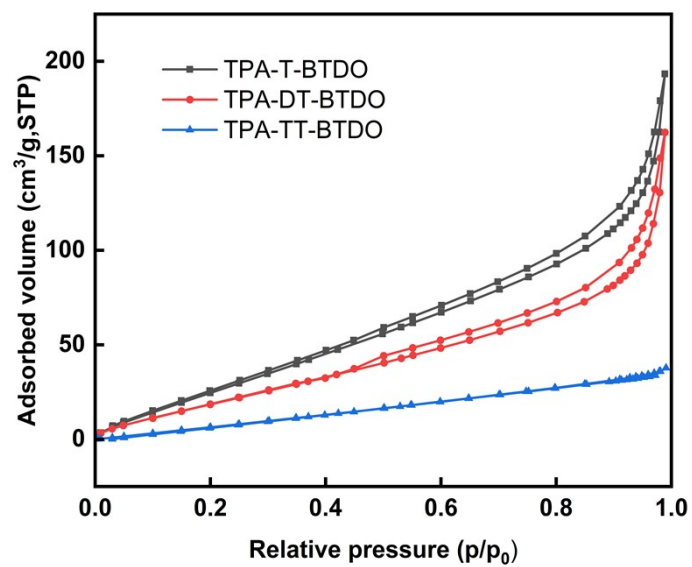

155

156 **Fig. S6** N<sub>2</sub> adsorption-desorption isotherms of the synthesized TPA-T-BTDO, TPA-DT-BTDO

157 and TPA-TT-BTDO polymers.

158

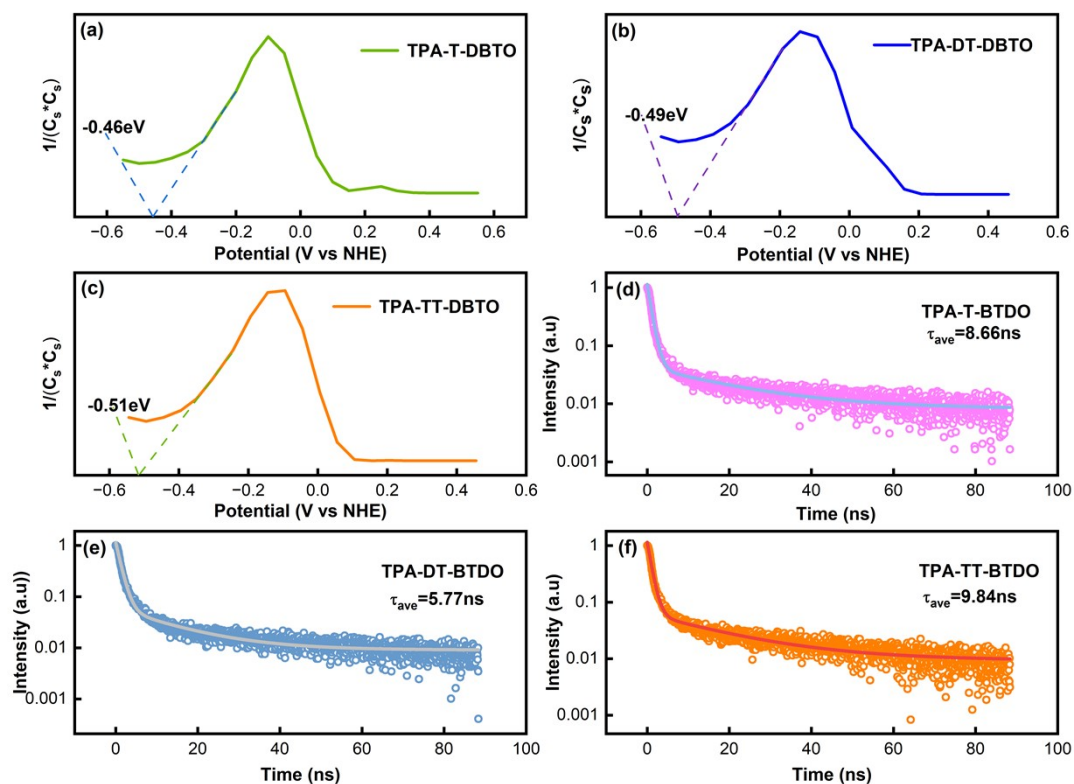

**Fig. S7** Mott Schottky curve (a-c) and Fluorescence lifetime of the TPA-T-BTDO, TPA-DT-BTDO, TPA-TT-BTDO polymers (d-f)

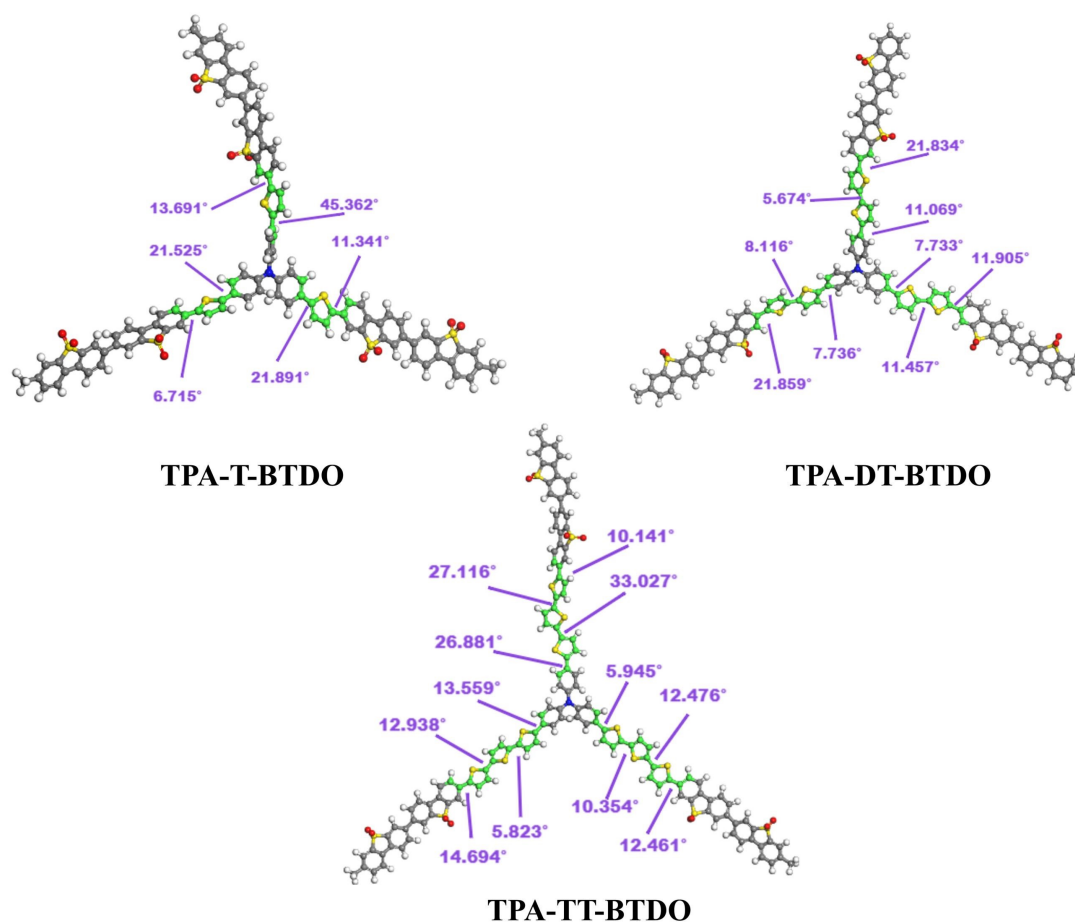

**Fig. S8** Torsion angle distribution of three polymers

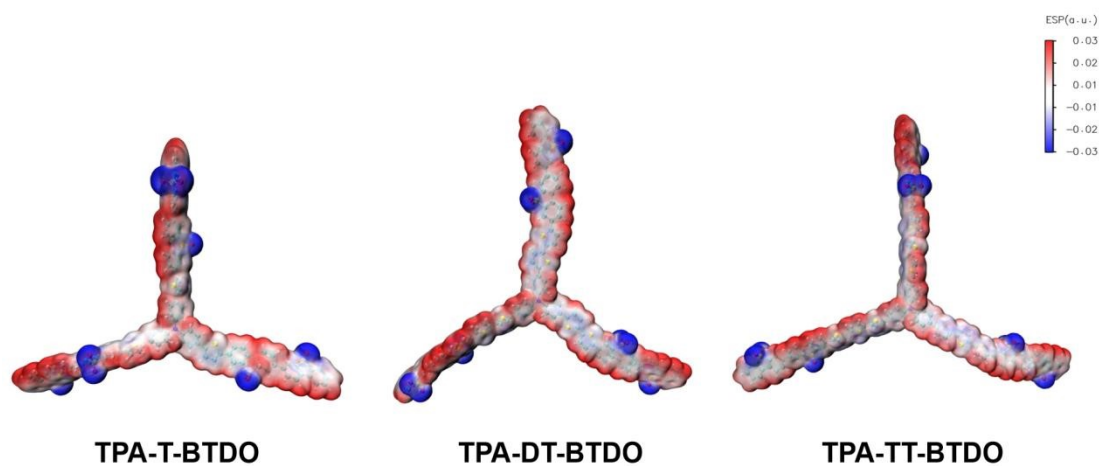

**Fig. S9** The electrostatic potential (ESP) maps of TPA-T-BTDO, TPA-DT-BTDO, and TPA-TT-BTDO

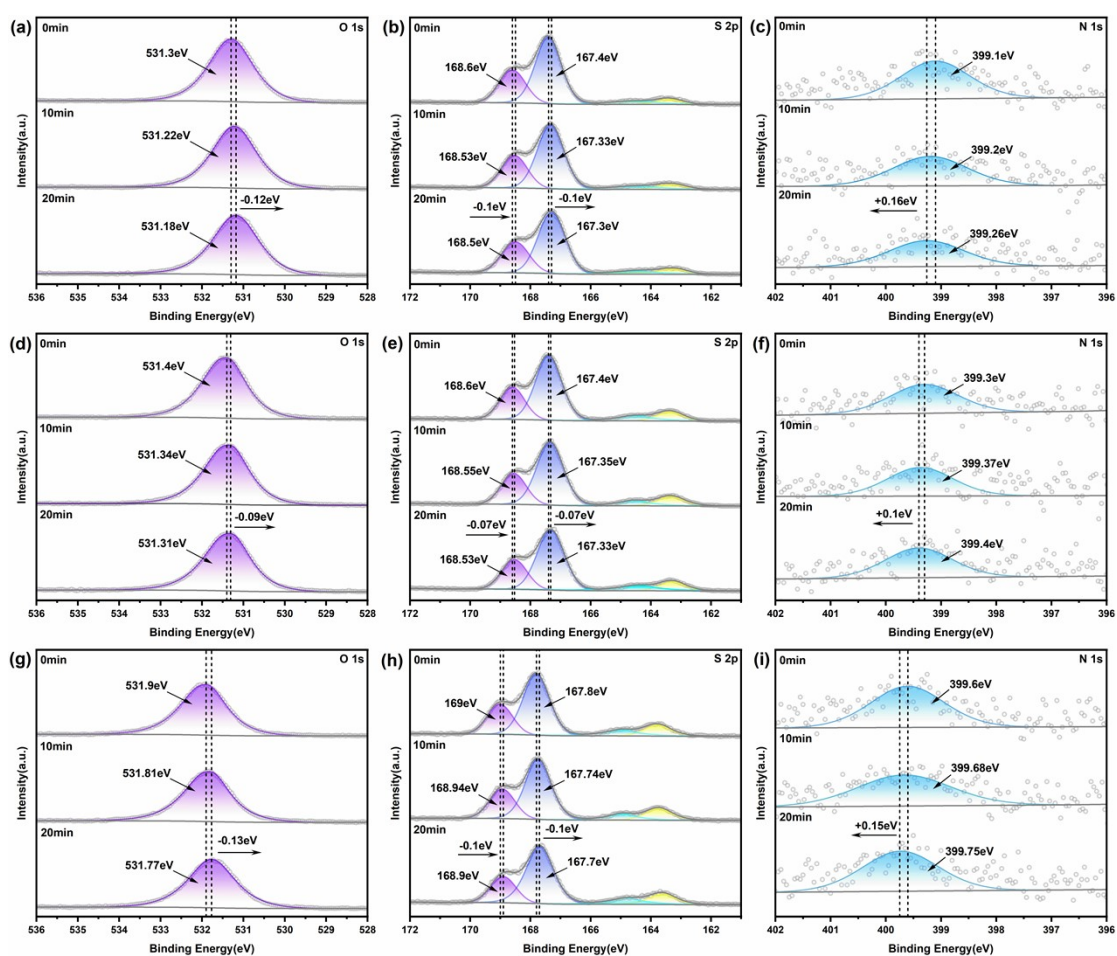

168

169 **Fig. S10** (a-c) Near in-situ XPS spectra of TPA-T-BTDO: (a) O 1s, (b) S 2p, (c) N 1s, (d-f) Near

170 in-situ XPS spectra of TPA-DT-BTDO: (d) O 1s, (e) S 2p, (f) N 1s, (g-i) Near in-situ XPS spectra

171 of TPA-TT-BTDO: (g) O 1s, (h) S 2p, (i) N 1s.

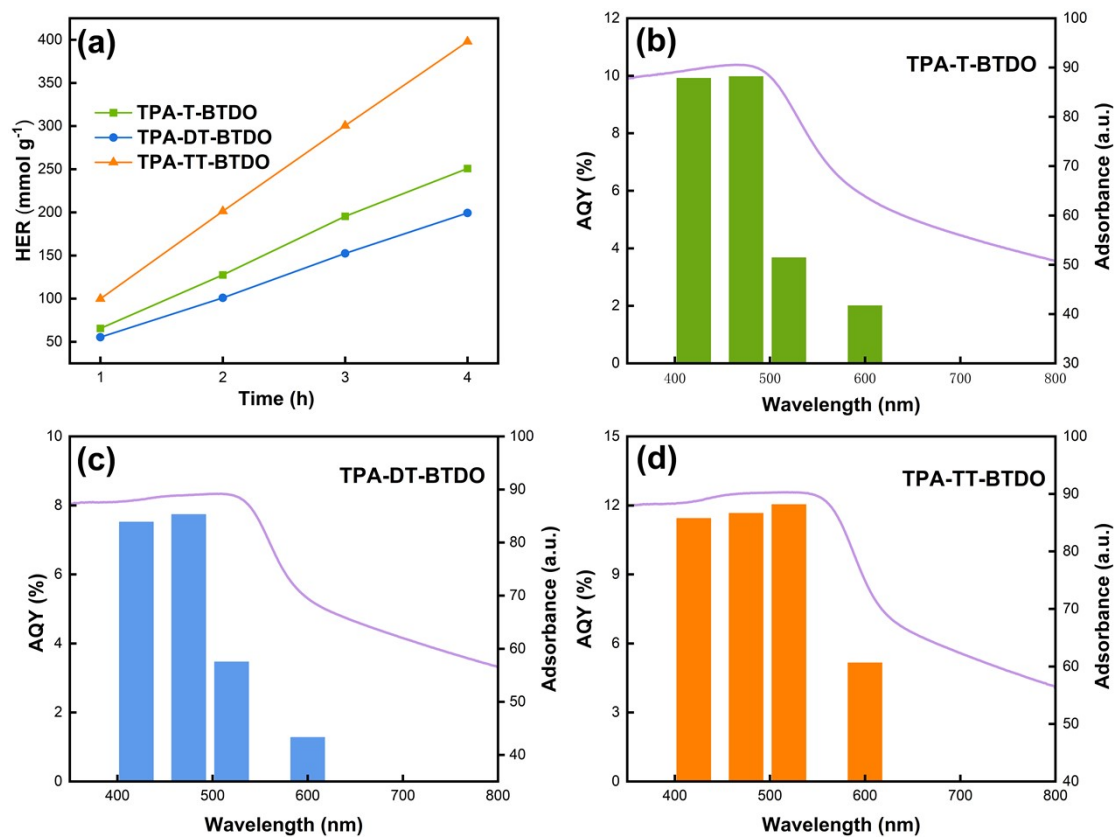

172  
 173 **Fig. S11** (a) HERs of TPA-T-BTDO, TPA-DT-BTDO, and TPA-TT-BTDO; (b) AQY of TPA-T-  
 174 BTDO; (c) AQY of TPA-DT-BTDO; (d) AQY of TPA-TT-BTDO

175



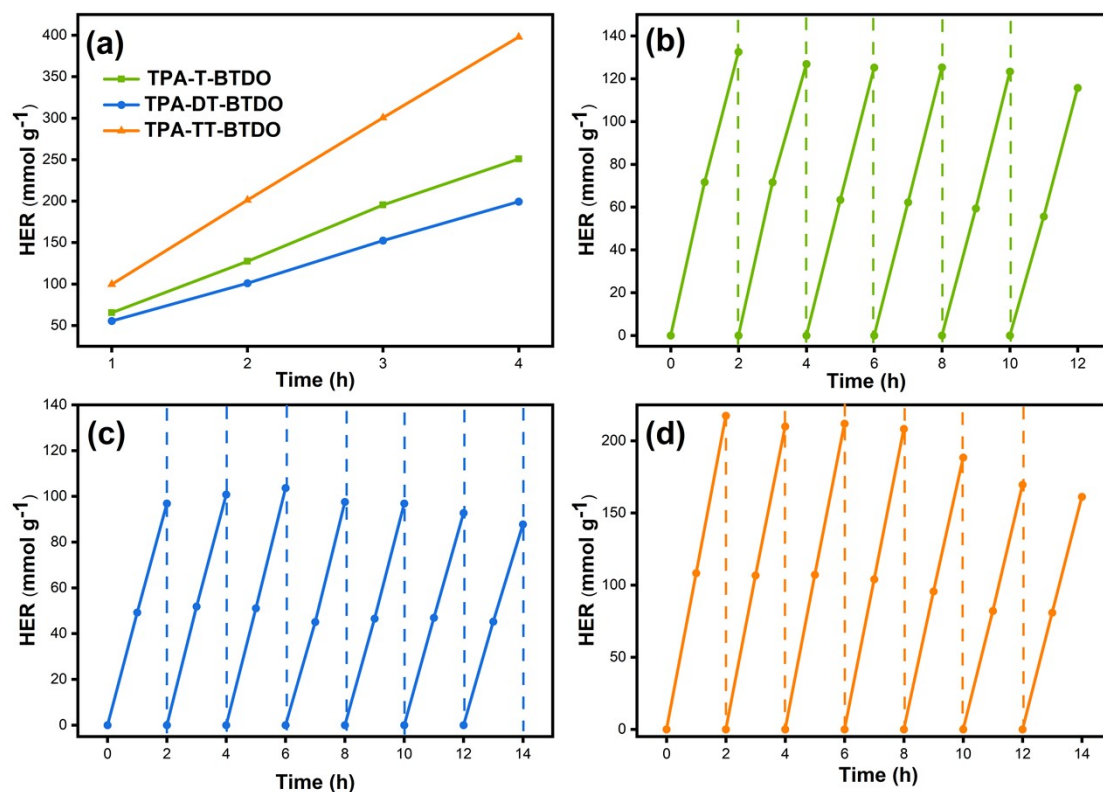

176  
 177 **Fig. S12** Cyclic performance of the polymers: (a) HER activity, cycling stability of (b) TPA-T-  
 178 BTDO, (c) TPA-DT-BTDO, (d) TPA-TT-BTDO

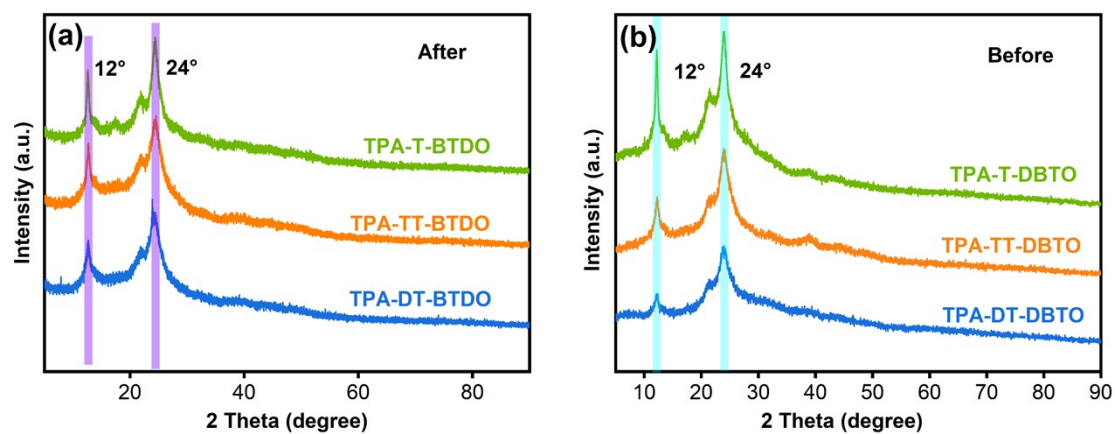

180  
 181 **Fig. S13** Structural characterization of polymer (b) before and (a) after hydrogenation.



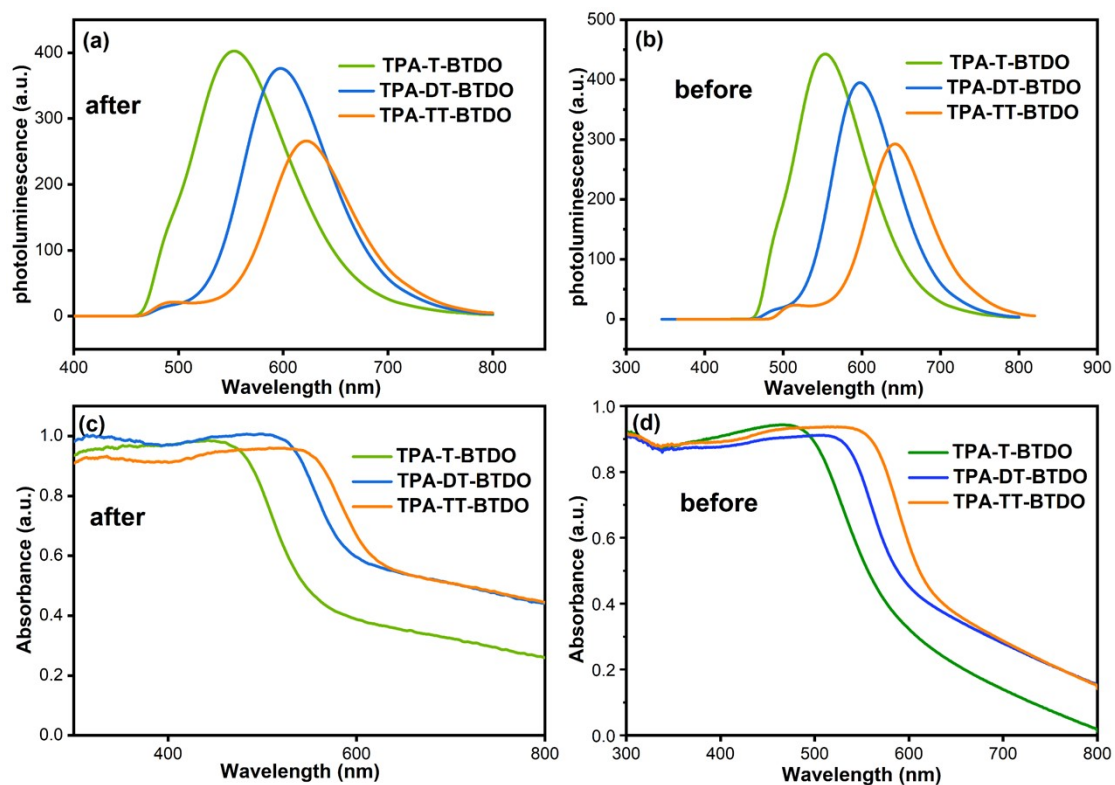

183

184 **Fig. S14** Repeated performance testing of polymer catalyst: (a) PL spectra of catalysts after  $H_2$

185 production; (b) PL spectra of catalysts before  $H_2$  production; (c) Uv-Vis spectra of catalysts after

186  $H_2$  production; (d) Uv-Vis spectra of catalysts before  $H_2$  production.

187

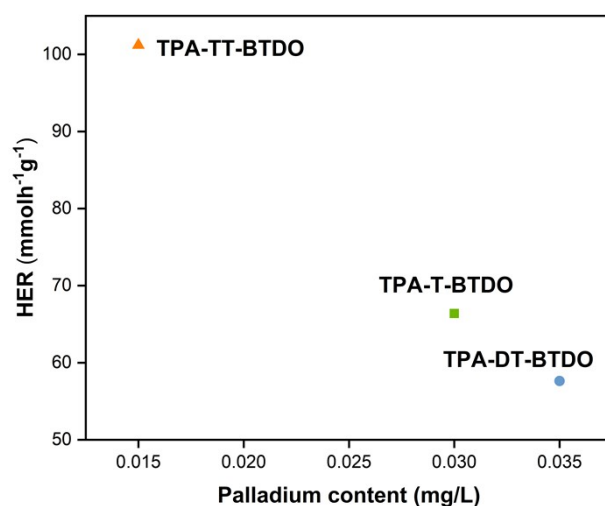

188

189 **Fig. S15** Residual Pd content in polymers as determined by ICP
